# Supplementary material for: Enhancing procedural knowledge in pregraduate surgical education: A controlled field study of interactive blended learning
Source: Research Square preprint supplement (doi:10.21203/rs.3.rs-7284460/v1), 2025-09-04
Supplement: Supplementary file 1 [file 5253573996b45d9505395b57.docx]

**Supplements to article:**

Enhancing procedural knowledge
in pregraduate surgical education:
A controlled field study of interactive blended learning.

# Figures

## Supplementary figure 1


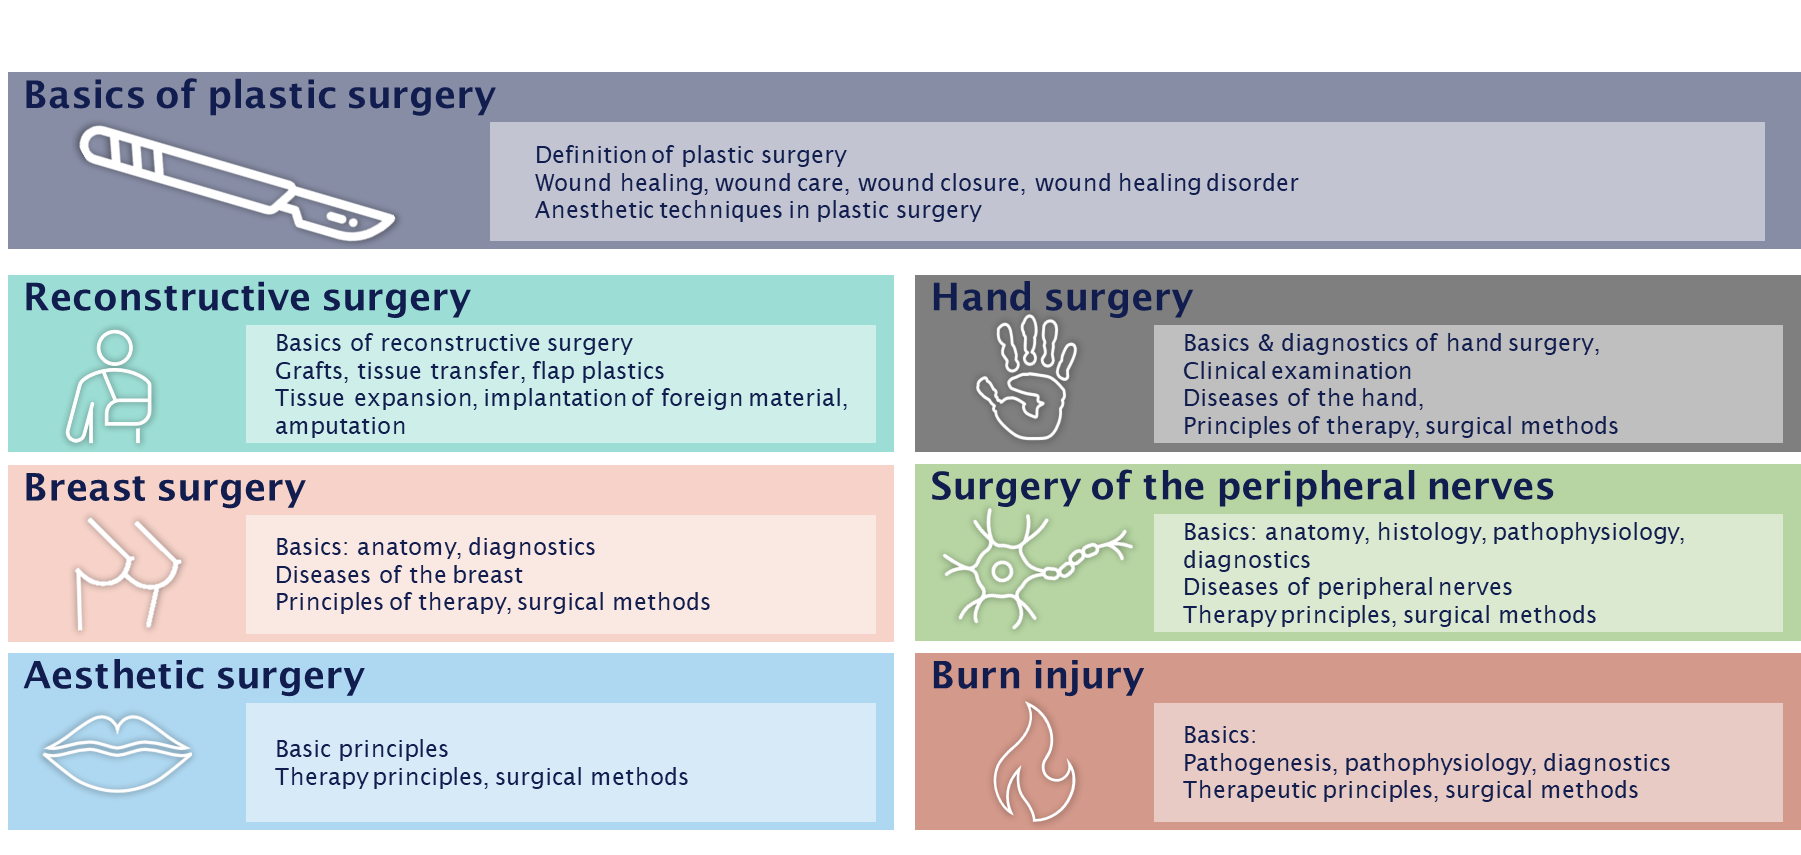


**Supplementary figure 2**: Course contents of the seven chapters, depicting the fields of conceptual knowledge.

## Supplementary figure 2
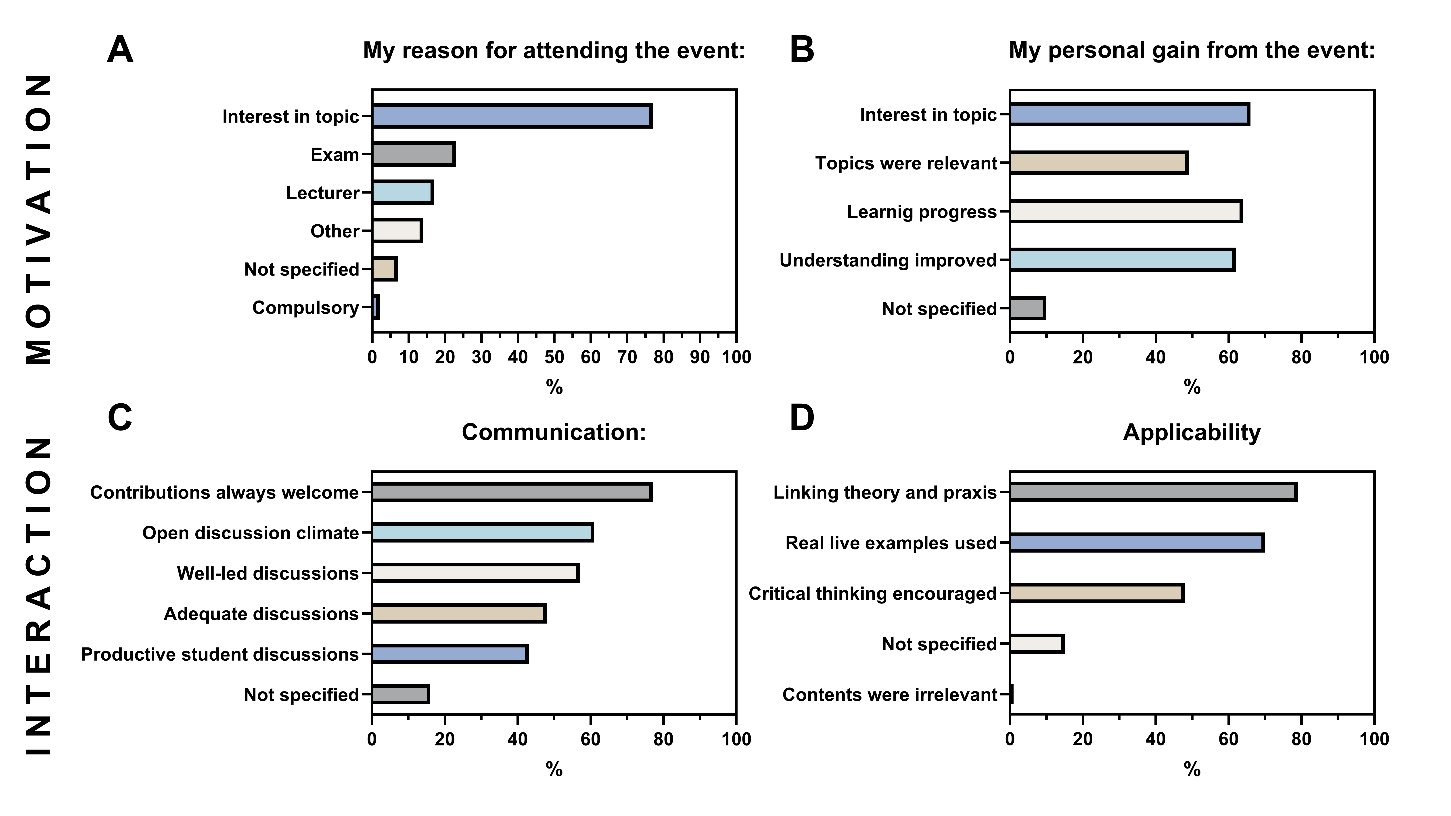


**Supplementary figure 3: TRIL questionnaire:** Student identification assessed via TRIL questionnaire excerpt on motivation and interaction, Figures A and B describe aspects of student motivation, figures C and D depict aspects of student interaction.

## Supplementary figure 3
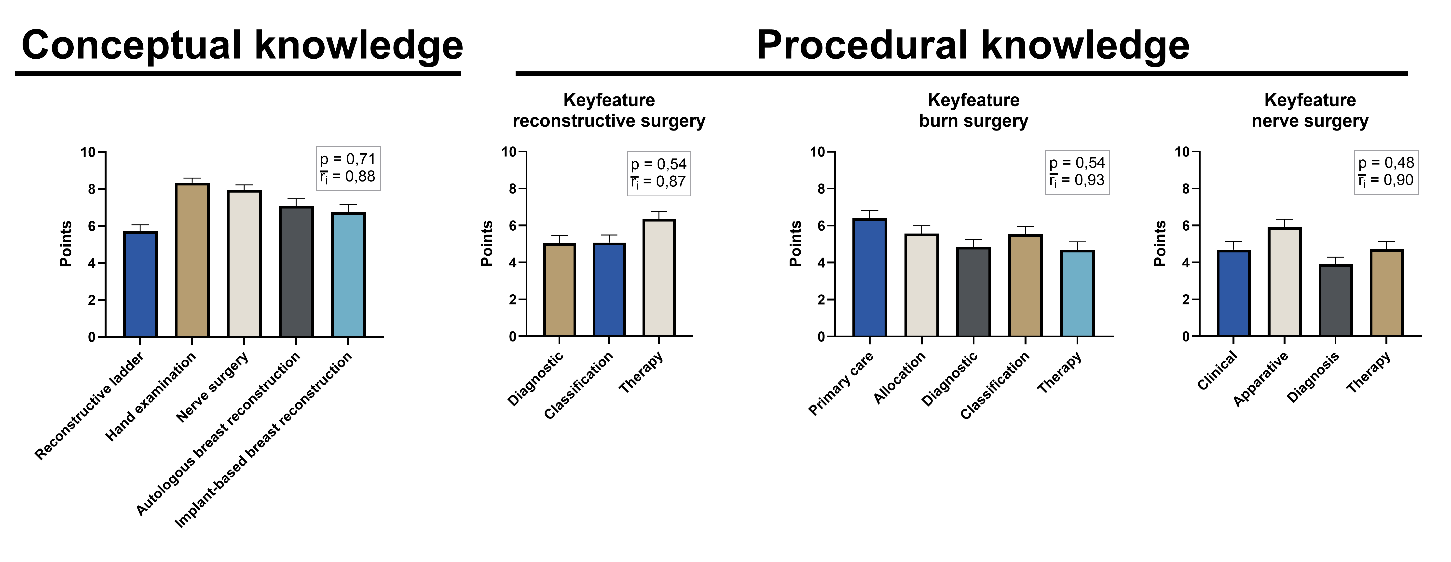


**Supplementary figure 3: Posttest results**: posttest scores depicted as mean + SEM for conceptual

# Tables

## Supplementary table 1

| Test | Area | test modality | n | test items | mean ± SD | Difficulty p | Discriminatory power ri |
| --- | --- | --- | --- | --- | --- | --- | --- |
| **Pretest** | Anatomy | Short answer | 101 | 2 | 24.75% ± 38.30% | 0.25 | 0.52 |
|  | Surgical basics | Short answer | 101 | 4 | 78.71% ± 27.56% | 0.79 | 0.60 |
|  | Assign diseases | Kprim | 101 | 8 | 58.75% ± 28.30% | 0.59 | 0.20 |
|  | Assign surgeries | Kprim | 101 | 11 | 83.91% ± 21.13% | 0.84 | 0.60 |
|  | **Pretest total** | **multiple** | **101** | **25** | **61.53% ± 28.82%** | **0.62** | **0.48** |
| **Posttest** | **Conceptional knowledge** |  |  |  |  |  |  |
|  | Reconstructive ladder | Drag & drop | 132 | 7 | 57.25% ± 38.59% | 0.57 | 0.80 |
|  | Hand examination | Drag & drop | 132 | 6 | 83.33% ± 29.30% | 0.83 | 0.79 |
|  | Nerve surgery | Drag & drop | 132 | 4 | 79.55% ± 30.28% | 0.80 | 0.83 |
|  | Breast reconstruction | Short answer | 132 | 2 | 69.13% ± 45.84% | 0.69 | 0.91 |
|  | **Conceptual knowledge total** | multiple | 132 | 19 | **71.25% ± 39.28%** | 0.71 | 0.86 |
|  | **Procedural knowledge** |  |  |  |  |  |  |
|  | Keyfeature reconstructive surgery | Key feature | 132 | 3 | 54.92% ± 40.71% | 0.55 | 0.88 |
|  | Keyfeature burn injury | Key feature | 132 | 5 | 54.11% ± 40.41% | 0.54 | 0.95 |
|  | Keyfeature nerve surgery | Key feature | 132 | 4 | 48.11% ± 40.23% | 0.48 | 0.93 |
|  | **Procedural knowledge total** | Key feature | 132 | 12 | 52.31% ± 37.46% | 0.52 | 0.92 |
|  | **Post test total** | **multiple** | **132** | **31** | **63.77% ± 37.91%** | **0.64** | **0.87** |

## Supplementary table 2

|  | **Conceptual knowledge** | | | **Procedural knowledge** | | |
| --- | --- | --- | --- | --- | --- | --- |
| **Column A** | Presence | Presence | Online | Presence | Presence | Online |
| **vs.** | vs. | vs. | vs. | vs. | vs. | vs. |
| **Column B** | Online | No participation | No participation | Online | No participation | No participation |
|  |  |  |  |  |  |  |
| **Unpaired t test with Welch's correction** | | | | | | |
| **P value** | 0.0274 | <0.0001 | 0.0373 | <0.0001 | <0.0001 | 0.5617 |
| **P value summary** | n.s. | ** | n.s. | ** | ** | n.s. |
| **Significantly different (P < 0.0083)?** | No | Yes | No | Yes | Yes | No |
| **One- or two-tailed P value?** | Two-tailed | Two-tailed | Two-tailed | Two-tailed | Two-tailed | Two-tailed |
| **Welch-corrected  t. df** | t=2.263. df=57.49 | t=4.286. df=45.50 | t=2.134. df=55.30 | t=8.628. df=88.31 | t=6.116. df=59.16 | t=0.5858. df=36.34 |
|  |  |  |  |  |  |  |
| **How big is the difference?** | | | | | | |
| **Mean of column A** | 42.48 | 42.48 | 35.96 | 82.05 | 82.05 | 35.96 |
| **Mean of column B** | 35.96 | 27.66 | 27.66 | 35.96 | 31.8 | 31.8 |
| **Difference between means**  **(B - A) ± SEM** | -6.518 ± 2.881 | -14.81 ± 3.457 | -8.296 ± 3.888 | -46.09 ± 5.341 | -50.25 ± 8.216 | -4.160 ± 7.101 |
| **95% confidence interval** | -12.29 to -0.7508 | -21.77 to -7.854 | -16.09 to -0.5062 | -56.70 to -35.47 | -66.68 to -33.81 | -18.56 to 10.24 |
| **R squared (eta squared)** | 0.08178 | 0.2876 | 0.07608 | 0.4574 | 0.3874 | 0.009354 |
|  |  |  |  |  |  |  |
| **F test to compare variances** | | | | | | |
| **F. DFn. Dfd** | 1.065. 30. 64 | 1.687. 29. 64 | 1.584. 29. 30 | 8.341. 64. 30 | 1.105. 64. 29 | 7.547. 29. 30 |
| **P value** | 0.8118 | 0.0839 | 0.2162 | <0.0001 | 0.7854 | <0.0001 |
| **P value summary** | ns | ns | ns | **** | ns | **** |
| **Significantly different (P < 0.05)?** | No | No | No | Yes | No | Yes |

## Supplementary table 3

|  | Interest in plastic surgery | Experience | Interest in lecture | Pretest score | Participation in case discussion | Enthusiasm after lesson | Posttest score |
| --- | --- | --- | --- | --- | --- | --- | --- |
| Interest in plastic surgery |  | R = 0.55 p = <0.0001 **** | R = 0.54 p = <0.0001 **** | R = 0.18 p = 0.2307 ns | R = 0.18 p = 0.2368 ns | R = 0.21 p = 0.1503 ns | R = 0.09 p = 0.5535 ns |
| Experience | R = 0.55 p = <0.0001 **** |  | R = 0.28 p = 0.0559 ns | R = 0.25 p = 0.0946 ns | R = -0.02 p = 0.9070 ns | R = 0.08 p = 0.5918 ns | R = -0.02 p = 0.8975 ns |
| Interest in lecture | R = 0.54 p = <0.0001 **** | R = 0.28 p = 0.0559 ns |  | R = 0.17 p = 0.2613 ns | R = 0.07 p = 0.6340 ns | R = 0.48 p = 0.0007 *** | R = 0.13 p = 0.3951 ns |
| Pretest score | R = 0.18 p = 0.2307 ns | R = 0.25 p = 0.0946 ns | R = 0.17 p = 0.2613 ns |  | R = 0.00 p = 0.9932 ns | R = 0.28 p = 0.0573 ns | R = 0.35 p = 0.0157 * |
| Participation in case discussion | R = 0.18 p = 0.2368 ns | R = -0.02 p = 0.9070 ns | R = 0.07 p = 0.6340 ns | R = 0.00 p = 0.9932 ns |  | R = 0.60 p = <0.0001 **** | R = 0.51 p = 0.0004 *** |
| Enthusiasm after lesson | R = 0.21 p = 0.1503 ns | R = 0.08 p = 0.5918 ns | R = 0.48 p = 0.0007 *** | R = 0.28 p = 0.0573 ns | R = 0.60 p = <0.0001 **** |  | R = 0.60 p = <0.0001 **** |
| Posttest score | R = 0.09 p = 0.5535 ns | R = -0.02 p = 0.8975 ns | R = 0.13 p = 0.3951 ns | R = 0.35 p = 0.0157 * | R = 0.51 p = 0.0004 *** | R = 0.60 p = <0.0001 **** |  |

Correlations of pre- and posttest items, R = Pearson correlation coefficient, p = level of significance, (* = p < 0.05; ** = p < 0.01; *** = p < 0.001; *** = p < 0.0001)
